# Supplementary material
Source: PubMed Central journal article supplement (PMC4633893)
Supplement: ajcr0005-2605-f6.pdf [file ajcr0005-2605-f6.pdf]

Differential regulation network analysis in gastric carcinogenesis

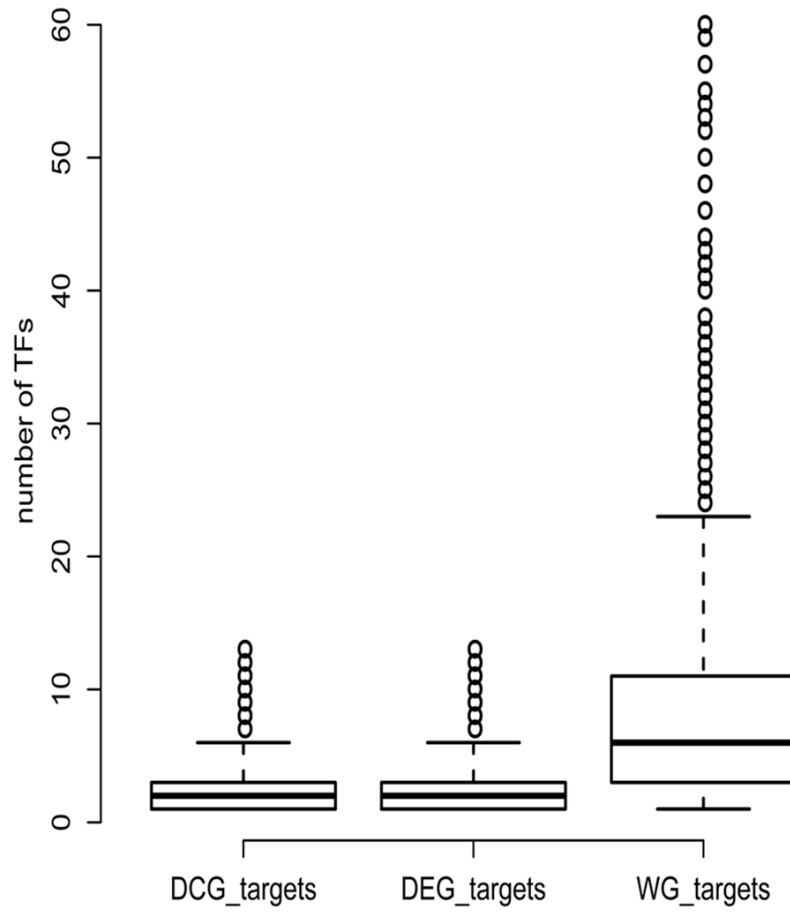

**Figure S1.** The distribution of number of TFs for DCG targets, DEG targets and WG targets in the candidate TF-target relationships. The horizontal axis represents each group of targets and the vertical axis represents the number of TFs.

## Differential regulation network analysis in gastric carcinogenesis

**Table S1.** The enrichment  $p$  values of cancer genes and drug targets in four groups of targets

| Group                 | Interest genes    | Common group |            |       | Differential group |                  |                  |          |
|-----------------------|-------------------|--------------|------------|-------|--------------------|------------------|------------------|----------|
| Normal vs. adenoma    | Cancer genes      | Common       | Non Common | Total | Known cancer gene  | Differential     | Non Differential | Total    |
|                       | Known cancer gene | 4            | 343        | 347   | Known cancer gene  | 33               | 314              | 347      |
|                       | Other genes       | 128          | 12183      | 12311 | Other genes        | 737              | 11574            | 12311    |
|                       | Total             | 132          | 12526      | 12658 | Total              | 770              | 11888            | 12658    |
|                       | $p$ -value        |              |            | 0.785 | $p$ -value         |                  |                  | 0.012    |
|                       | Drug targets      | Common       | Non Common | Total | Differential       | Non Differential | Total            |          |
|                       | Drug targets      | 26           | 1628       | 1654  | Drug targets       | 134              | 1520             | 1654     |
|                       | Other genes       | 106          | 10898      | 11004 | Other genes        | 636              | 10368            | 11004    |
|                       | Total             | 132          | 12526      | 12658 | Total              | 770              | 11888            | 12658    |
|                       | $p$ -value        |              |            | 0.027 | $p$ -value         |                  |                  | 0.0003   |
| Adenoma vs. carcinoma | Cancer genes      | Common       | Non Common | Total | Known cancer gene  | Differential     | Non Differential | Total    |
|                       | Known cancer gene | 6            | 341        | 347   | Known cancer gene  | 32               | 315              | 347      |
|                       | Other genes       | 139          | 12172      | 12311 | Other genes        | 749              | 11562            | 12311    |
|                       | Total             | 145          | 12513      | 12658 | Total              | 781              | 11877            | 12658    |
|                       | $p$ -value        |              |            | 0.297 | $p$ -value         |                  |                  | 0.023    |
|                       | Drug targets      | Common       | Non Common | Total | Differential       | Non Differential | Total            |          |
|                       | Drug targets      | 25           | 1629       | 1654  | Drug targets       | 148              | 1506             | 1654     |
|                       | Other genes       | 120          | 10884      | 11004 | Other genes        | 633              | 10371            | 11004    |
|                       | Total             | 145          | 12513      | 12658 | Total              | 781              | 11877            | 12658    |
|                       | $p$ -value        |              |            | 0.137 | $p$ -value         |                  |                  | 1.67E-06 |

## Differential regulation network analysis in gastric carcinogenesis

**Table S2.** Top 4% genes of normal vs. adenoma DRG list and top 6% genes of adenoma vs. carcinoma DRG list

| Normal vs. Adenoma |         | Adenoma vs. Carcinoma |         |                |         |
|--------------------|---------|-----------------------|---------|----------------|---------|
| Genes              | DR_rank | Genes                 | DR_rank | Genes          | DR_rank |
| <b>LIMS1</b>       | 1       | <b>ESRRG</b>          | 1       | <b>HEPH</b>    | 37      |
| FOSB               | 2       | <b>LIMS1</b>          | 2       | <b>PTK7</b>    | 38      |
| MRPL36             | 3       | IRF2                  | 3       | SYNPO          | 39      |
| <b>GATA3</b>       | 4       | RGS3                  | 4       | ACSL5          | 40      |
| RGS3               | 5       | FOSB                  | 5       | ETFB           | 41      |
| TRIB1              | 6       | <b>CEBPB</b>          | 6       | <b>MMP7</b>    | 42      |
| <b>GATA6</b>       | 7       | TRIB1                 | 7       | <b>CTSA</b>    | 43      |
| <b>SOX9</b>        | 8       | <b>AHR</b>            | 8       | <b>PPP1R1B</b> | 44      |
| <b>HEPH</b>        | 9       | <b>POU2F1</b>         | 9       | <b>E2F3</b>    | 45      |
| RIC8B              | 10      | <b>TGIF1</b>          | 10      | STAM           | 46      |
| <b>AHR</b>         | 11      | FOSL1                 | 11      | <b>CCND2</b>   | 47      |
| <b>MGAM</b>        | 12      | <b>ID1</b>            | 12      | <b>PBX3</b>    | 48      |
| <b>GIF</b>         | 13      | <b>GSTP1</b>          | 13      | ABR            | 49      |
| MME                | 14      | CITED1                | 14      | <b>ITM2C</b>   | 50      |
| <b>RARA</b>        | 15      | <b>EYA1</b>           | 15      | <b>GATA6</b>   | 51      |
| <b>CEBPB</b>       | 16      | <b>ERBB3</b>          | 16      | <b>DDIT3</b>   | 52      |
| <b>TGIF1</b>       | 17      | <b>IRF1</b>           | 17      | CRLS1          | 53      |
| <b>POU2F1</b>      | 18      | ELF1                  | 18      | ITGB1BP2       | 54      |
| FABP2              | 19      | <b>IL10</b>           | 19      | GK             | 55      |
| RGS5               | 20      | PFN1                  | 20      | <b>CDX1</b>    | 56      |
| TM4SF20            | 21      | <b>STAT5A</b>         | 21      |                |         |
| CITED1             | 22      | <b>PRKACB</b>         | 22      |                |         |
| SYNPO              | 23      | ZMYND8                | 23      |                |         |
| <b>DDIT3</b>       | 24      | CYP8B1                | 24      |                |         |
| ZNF609             | 25      | <b>SOX9</b>           | 25      |                |         |
| <b>EYA1</b>        | 26      | <b>ID3</b>            | 26      |                |         |
| <b>STAM</b>        | 27      | DMKN                  | 27      |                |         |
| <b>PDGFRB</b>      | 28      | <b>SERPINA1</b>       | 28      |                |         |
| MYO15B             | 29      | NAV2                  | 29      |                |         |
| <b>ID1</b>         | 30      | <b>GATA3</b>          | 30      |                |         |
| DMKN               | 31      | MRPL36                | 31      |                |         |
| <b>IRF1</b>        | 32      | SOX5                  | 32      |                |         |
| <b>PRKACB</b>      | 33      | <b>GKN1</b>           | 33      |                |         |
| PFN1               | 34      | STAT2                 | 34      |                |         |
| ACSL5              | 35      | GABRA5                | 35      |                |         |
| MYL9               | 36      | ISG15                 | 36      |                |         |

The genes are sorted by the DR values. Genes in bold refer to GC-related genes.

## Differential regulation network analysis in gastric carcinogenesis

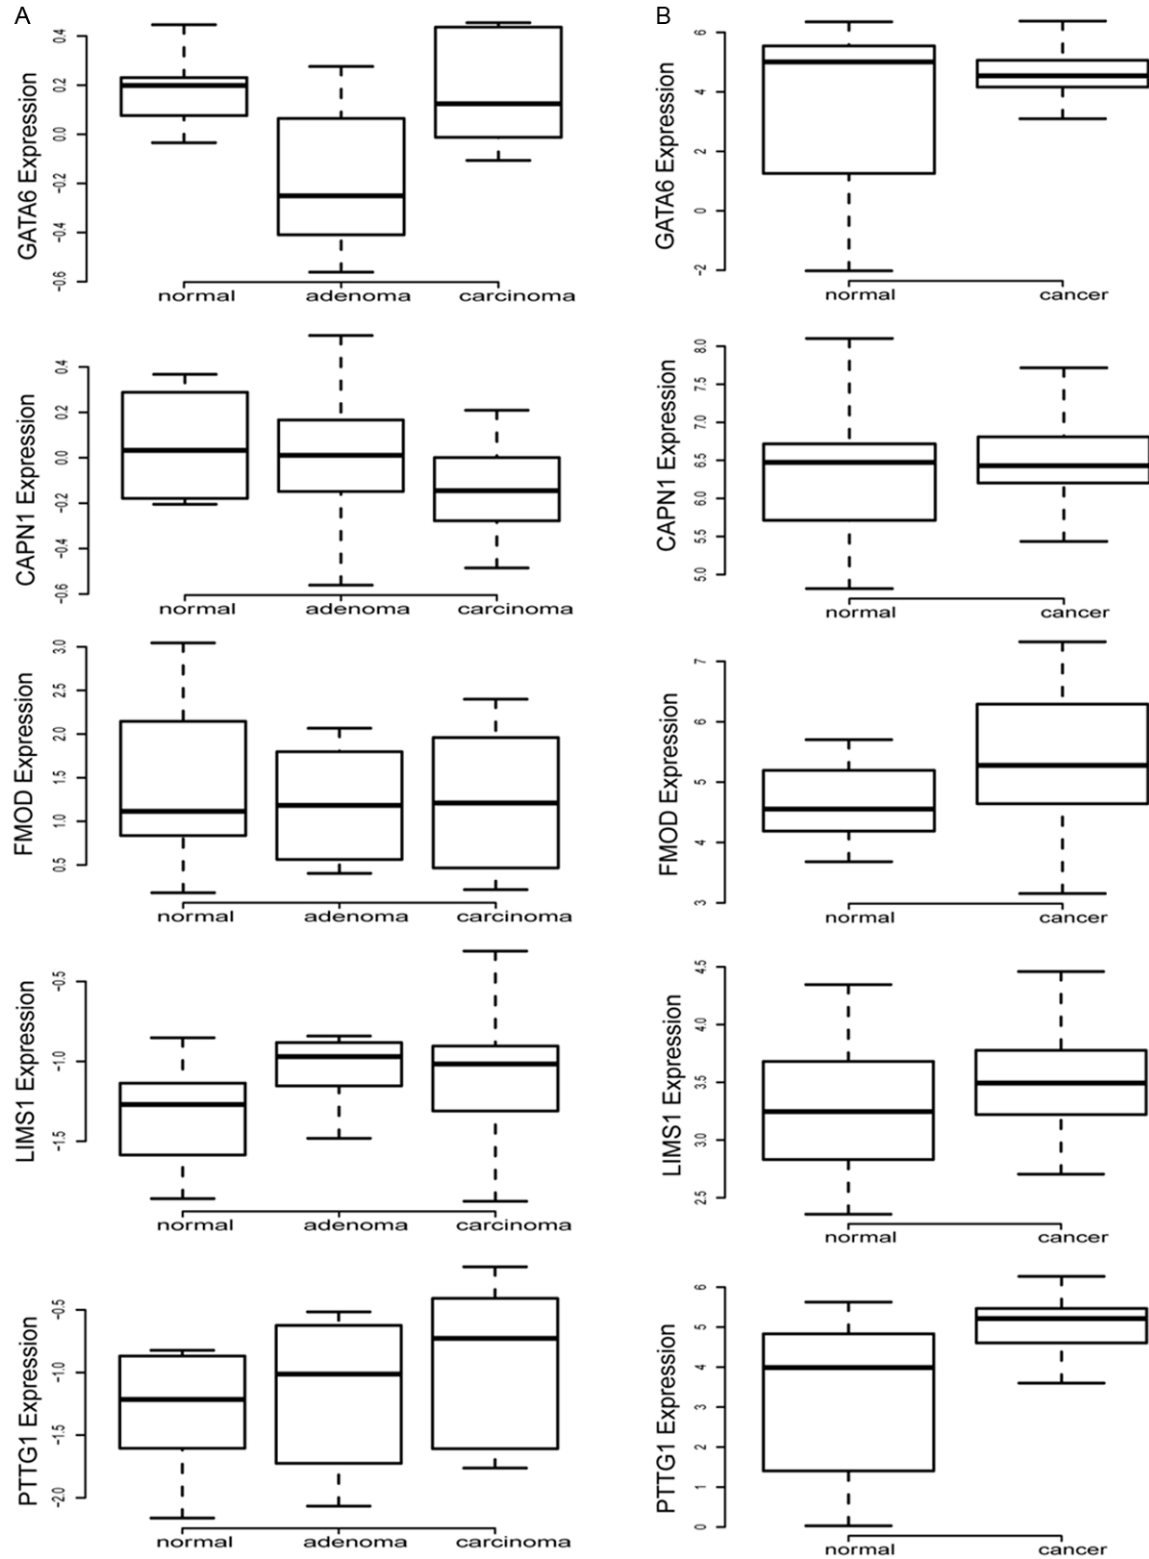

**Figure S2.** The expression level of GATA6, CAPN1, FMOD, LIMS1 and PTTG1 in GSE24375 (A) and TCGA (B) data sets. (A) The log<sub>2</sub> transformed expression level of GATA6, CAPN1, FMOD, LIMS1 and PTTG1 in normal, adenoma and carcinoma samples of GSE24375 dataset. (B) The log<sub>2</sub> transformed expression level of GATA6, CAPN1, FMOD, LIMS1 and PTTG1 in normal and carcinoma samples of TCGA dataset.

## Differential regulation network analysis in gastric carcinogenesis

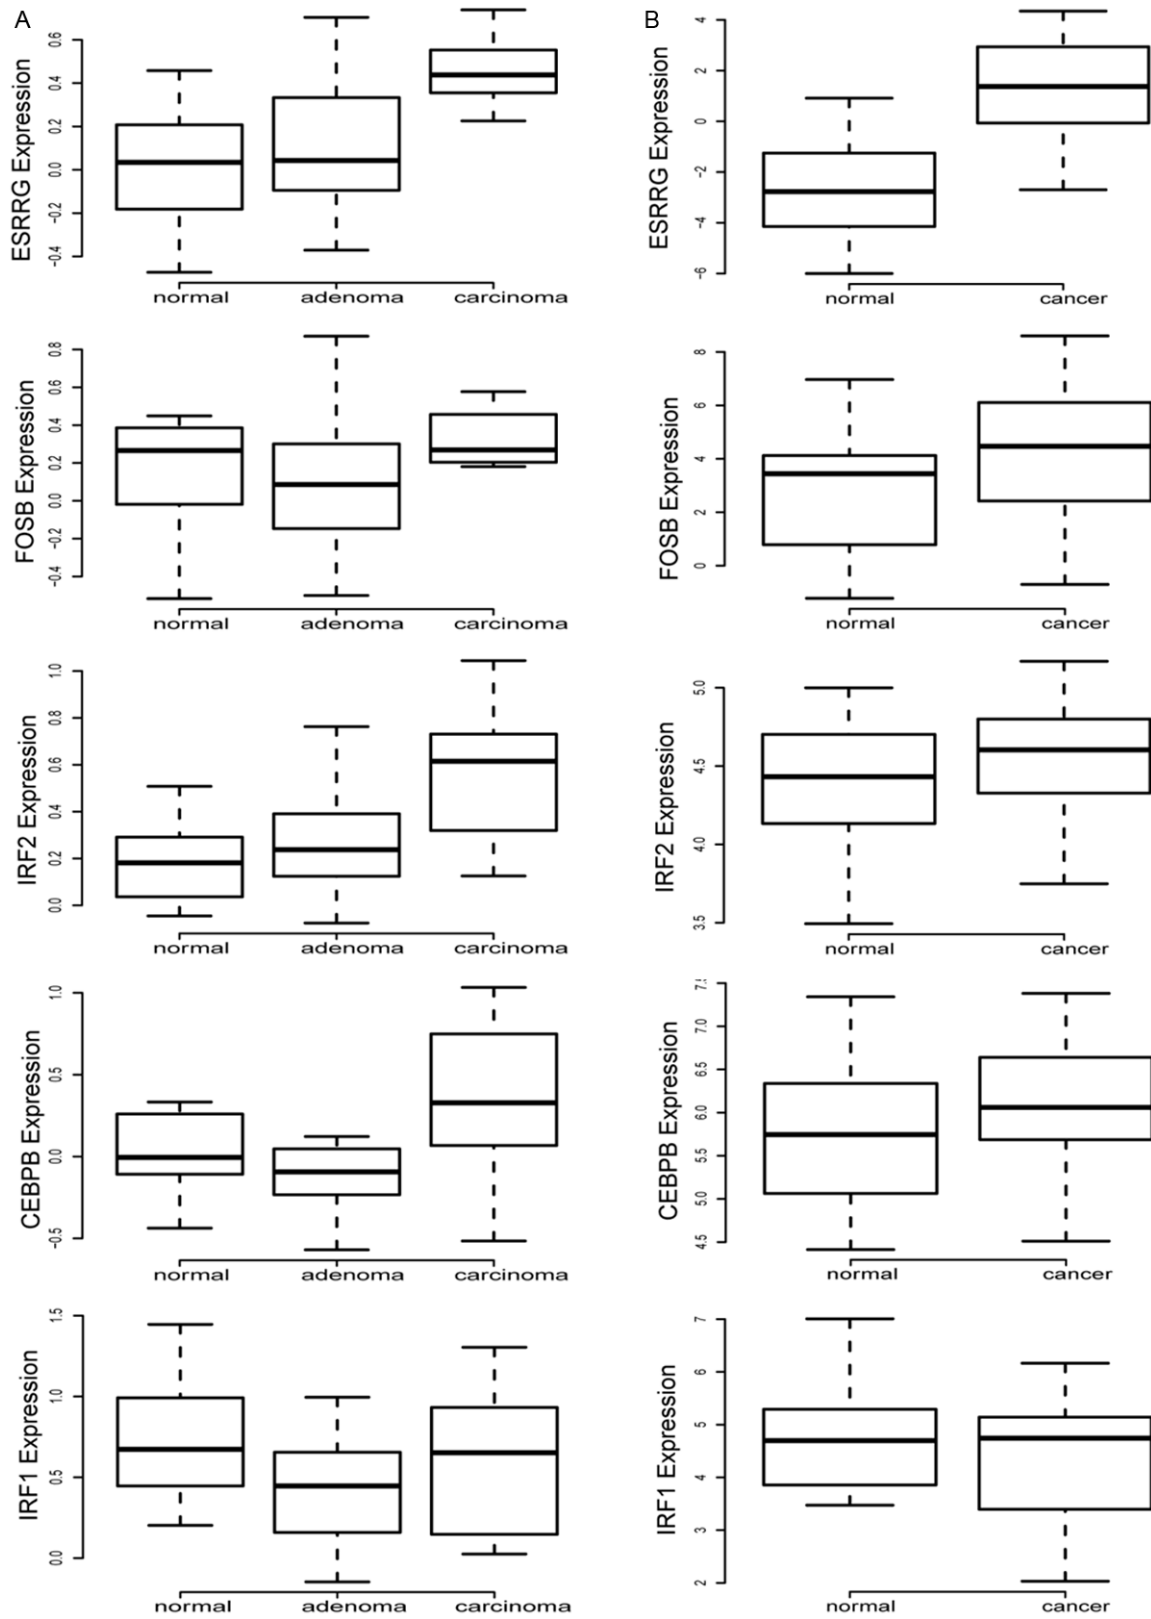

**Figure S3.** The expression level of ESRRG, FOSB, IRF2, CEBPB and IRF1 in GSE24375 (A) and TCGA (B) data sets. (A) The expression level of ESRRG, FOSB, IRF2, CEBPB and IRF1 in normal, adenoma and carcinoma samples of GSE24375 dataset. (B) The expression level of ESRRG, FOSB, IRF2, CEBPB and IRF1 in normal and carcinoma samples of TCGA dataset.
